# Supplementary material for: Cognitive domain-specific impairments and associated risk factors in type 2 diabetes mellitus: a cross-sectional observational study based on neuropsychological assessment from Xiamen, China
Source: PeerJ. 2025 Nov 4;13:e20292. doi: 10.7717/peerj.20292 (PMC12593723; doi:10.7717/peerj.20292)
Supplement: Supplemental Information 1 [file peerj-13-20292-s001.xlsx]

## Sheet: raw data
Patient Number	Amnestic mild cognitive impairment(1 = Yes, 0 = No)	cognitive impairment(MOCA 1 = Yes, 0 = No)	cognitive impairment(MMSE 1 = Yes, 0 = No)	education year	mild cognitive impairment-（MMSE1 = Yes, 0 = No）	mild cognitive impairment-(MOCA1 = Yes, 0 = No)	MOCA socre	MMSE socre	Visuospatial/executive socre	Language/Naming/Abstraction socre	Naming socre	Attention socre socre	Language socre	Abstraction socre	Memory delayed recall socre	orientation socre	Stroop-A（Completion time in seconds）	Stroop-B（Completion time in seconds）	Stroop-C（Completion time in seconds）	StroopC-A	VFT（Verbal Fluency Test，number）	VFT Problem (1 = Yes, 0 = No)	DST（Digit Span forward Test，number）	DST Problem (1 = Yes, 0 = No)	Digit Symbol Substitution Test	DSST Problem (1 = Yes, 0 = No)	Auditory Verbal Learning Test N1	N2	N3	N1+N2+N3Immediate memory	N4Short term memory	N5	AVLT total score	AVLT Problem (1 = Yes, 0 = No)	Block Design score	Clock Drawing Test score	gender（0-male，1-female）	age（year）	BMI（kg/m2）	year of education	Duration of diabetes(yr)	Peripheral neuropathy (1 = Yes, 0 = No)	Diabetic nephropathy(1 = Yes, 0 = No)	Diabetic retinopathy(1 = Yes, 0 = No)	Hypoglycemia occurred more than 3 times(1 = Yes, 0 = No)	Hyperlipidemia(1 = Yes, 0 = No)	Hypertension(1 = Yes, 0 = No)	History of alcohol consumption(1 = Yes, 0 = No)	smoking(1 = Yes, 0 = No)
1		0	0	8	0	0	29	30	4	8	3	6	3	2	5	6	13.18	17.05	40.28	27.1	11	1	8	0	38	0	3	9	10	22	8	8	38	0	24	10	1	63	33.3205	8	5	1	1	0	0	0	1	0	0
2	0	1	0	16	0	0	24	27	5	6	3	6	2	1	2	5	24.15	40.23	80.18	56.03	11	1	6	1	31	1	4	5	8	17	6	5	28	0	24	9	0	68	21.55	13	16	1	0	1	1	1	1	1	1
3		0	0	6	0	0	29	30	4	8	3	6	3	2	5	6	13.18	17.05	40.28	27.1	11	1	8	0	38	0	3	9	10	22	8	8	38	0	24	10	1	61	20.95	5	5	0	0	0	0	0	1	0	0
4		0	0	10	0	0	29	29	5	8	3	6	3	2	4	6	10.27	15.73	33.78	23.51	16	0	8	0	36	0	5	6	8	19	8	8	35	0	32	10	1	64	22.4766	10	8	1	0	0	1	1	1	0	0
5		0	0	16	0	0	28	28	5	7	3	6	3	1	4	6	29.88	35.84	95.81	65.93	20	0	9	0	29	1	6	7	9	22	7	7	36	0	28	9	0	76	23.6614	16	15	1	0	0	1	1	0	1	1
6		0	0	14	0	0	28	28	5	7	3	6	3	1	4	6	28.76	33.42	89.54	60.78	21	0	10	0	31	1	6	7	9	21	7	7	35	0	32	9	0	73	21.97	14	6	1	1	0	0	0	0	1	1
7		0	0	12	0	0	28	28	5	6	3	6	2	1	4	6	13.15	20.9	48.85	35.7	12	1	8	0	33	1	4	5	6	15	6	6	27	0	42	10	0	54	22.7732	12	3	1	1	0	0	1	1	1	1
8		0	0	15	0	0	27	30	5	7	3	6	3	1	3	6	9.41	14.13	25.14	15.73	22	0	10	0	33	1	5	8	10	23	8	6	37	0	37	10	0	60	23.6614	15	3	0	0	0	0	1	1	1	0
9		0	0	12	0	0	27	30	5	8	3	6	3	2	2	6	13.01	21.57	56.26	43.25	22	0	8	0	34	0	4	7	8	19	6	5	30	0	34	10	1	66	25.3906	12	24	1	1	0	1	1	1	0	0
10		0	0	8	0	0	27	30	4	6	3	6	2	1	5	6	9.23	17.25	37.25	28.02	9	1	12	0	46	0	6	9	7	22	8	7	37	0	32	6	0	49	21.84	8	6	0	0	0	0	1	0	0	0
11		0	0	9	0	0	27	30	4	6	3	6	2	1	5	6	8.69	17.12	33.75	25.06	9	1	12	0	51	0	7	9	7	23	8	7	38	0	32	6	0	47	26.1286	9	9	1	1	0	0	1	1	1	0
12		0	0	12	0	0	27	30	3	7	3	6	3	1	5	6	12.21	17.33	60.33	48.12	18	0	6	1	32	1	3	7	8	18	6	5	29	1	24	8	0	68	26.7299	12	11	1	0	0	0	1	1	1	1
13		0	0	6	0	0	29	30	4	8	3	6	3	2	5	6	13.18	17.05	40.28	27.1	11	1	8	0	38	0	3	9	10	22	8	8	38	0	24	10	1	61	20.95	3	5	0	0	0	0	0	1	0	0
14		0	0	18	0	0	27	29	5	6	3	6	2	1	4	6	10.95	20.44	51.99	41.04	12	1	8	0	37	0	5	8	8	21	4	5	30	0	34	10	0	64	22.6474	18	6	1	1	0	0	1	0	0	0
15		0	0	9	0	0	27	27	5	7	3	6	2	2	3	6	9.6	33.69	36.32	26.72	15	0	11	0	30	1	4	5	7	16	3	3	22	1	26	10	0	62	22.1453	9	3	0	0	0	0	1	0	1	1
16		0	0	12	0	0	27	29	4	8	3	6	3	2	3	6	16.45	22.89	68.66	52.21	18	0	8	0	35	0	4	7	8	19	6	6	31	0	34	10	1	61	25.39	10	9	1	0	0	1	0	1	0	0
17		0	0	9	0	0	26	30	4	7	3	6	3	1	3	6	12.56	19.03	29.58	17.02	18	0	12	0	51	0	4	6	12	22	9	0	31	0	40	7	1	46	23.5883	9	20	1	0	0	0	1	1	0	0
18		0	0	1	0	0	26	30	5	7	3	5	3	1	3	6	13.46	16.283	37.65	24.19	16	0	10	0	46	0	3	6	8	17	6	5	28	0	32	10	1	67	23.51	6	9	0	0	0	0	0	1	0	1
19		0	0	8	0	0	26	30	4	7	3	5	2	2	4	6	13.55	28	60.14	46.59	19	0	10	0	34	0	4	3	8	15	7	6	28	1	32	7	1	62	22.5981	8	13	1	1	1	0	1	0	0	1
20		0	0	16	0	0	26	29	3	8	3	6	3	2	3	6	10.58	15.81	42.5	31.92	18	0	8	0	45	0	3	8	9	20	6	3	29	0	30	7	1	49	21.5645	16	21	0	0	0	0	1	0	0	0
21		0	0	8	0	0	27	30	4	6	3	6	2	1	5	6	9.23	17.25	37.25	28.02	9	1	12	0	46	0	6	9	7	22	8	7	37	0	32	6	0	49	21.84	8	6	0	0	0	0	1	0	0	0
22		0	0	15	0	0	26	29	5	7	3	5	3	1	3	6	10.55	14.8	43.51	32.96	16	0	9	0	40	0	3	6	8	17	6	4	27	0	32	10	1	60	28.03	15	0.25	0	0	0	0	1	0	0	0
23		0	0	12	0	0	26	29	5	7	3	6	3	1	2	6	22.02	23.45	39.98	17.96	14	0	7	1	26	1	1	3	8	12	2	3	17	0	34	10	1	68	23.7118	12	13	1	0	0	1	1	0	0	0
24		0	0	10	0	0	26	29	5	6	3	6	2	1	3	6	21.76	22.36	46.9	25.14	12	1	11	0	35	0	4	7	6	17	4	6	27	0	28	10	0	51	26.7755	10	9	1	0	0	0	1	1	1	1
25		0	0	5	0	0	26	29	3	7	3	5	3	1	4	6	21.34	30.27	62.53	41.19	13	0	8	0	29	1	3	6	5	14	2	4	20	0	26	4	0	57	23.38	5	5	1	0	0	0	1	0	0	0
26		0	0	2	0	0	26	29	2	8	3	5	3	2	4	6	14.07	24.49	50.97	36.9	12	1	6	1	29	1	3	6	5	14	2	4	20	1	26	4	0	53	26.079	2	10	1	1	0	0	1	0	1	1
27		0	0	2	0	0	26	29	2	8	3	5	3	2	4	6	14.07	24.49	50.97	36.9	12	1	6	1	29	1	3	6	5	14	2	4	20	1	26	4	0	53	26.079	6	10	1	1	0	0	1	0	1	1
28		0	0	9	0	0	26	28	4	7	3	6	3	1	3	6	11.47	17.64	63.13	51.66	9	1	7	1	26	1	4	6	6	16	3	2	21	0	28	10	1	71	28.764	9	24	1	0	0	0	1	1	0	0
29		0	0	9	0	0	26	28	4	7	3	6	3	1	3	6	11.47	17.64	63.13	51.66	9	1	7	1	26	1	4	6	6	16	3	2	21	0	28	10	1	71	28.764	9	24	1	0	0	0	1	1	0	0
30	0	1	0	9	0	0	25	30	4	6	3	6	3	0	3	6	14.13	21.22	45.23	31.1	11	1	8	0	22	1	5	6	7	18	6	5	29	1	30	10	0	73	21.4996	9	0.1	0	0	0	0	1	0	1	1
31	0	1	0	12	0	0	25	29	2	7	3	5	3	1	5	6	14.13	20.24	30.65	16.52	16	0	4	1	17	1	6	7	8	21	7	7	35	0	24	6	1	68	24.2439	12	8	1	0	0	0	1	0	0	0
32	0	1	1	12	0	0	25	26	3	6	3	6	1	2	4	6	10.81	16.13	60.04	49.23	13	1	8	0	20	1	2	6	7	15	7	4	26	1	24	10	1	75	29.0487	12	15	1	0	0	0	1	0	0	0
33	0	1	0	5	0	0	24	29	5	5	3	6	2	0	2	6	11.83	18.14	39.09	27.26	13	0	11	0	21	1	5	6	6	17	4	5	26	1	32	10	0	60	27.7778	5	4	1	1	0	1	1	1	1	1
34		0	0	14	0	0	28	28	5	7	3	6	3	1	4	6	28.76	33.42	89.54	60.78	21	0	10	0	31	1	6	7	9	21	7	7	35	0	32	9	0	73	21.97	14	6	1	1	0	0	0	0	1	1
35	0	1	0	12	0	0	24	27	5	7	3	6	2	2	1	5	11.06	35.29	70.34	59.28	16	0	5	1	30	1	4	5	8	17	6	5	28	0	18	9	0	65	20.42	12	25	1	0	0	0	1	0	1	1
36	0	1	0	16	0	0	24	27	5	6	3	6	2	1	2	5	24.15	40.23	80.18	56.03	11	1	6	1	31	1	4	5	8	17	6	5	28	0	24	9	0	68	21.55	13	16	1	0	1	1	1	1	1	1
37	0	1	0	12	0	0	24	27	4	8	3	5	3	2	2	5	15.02	14.25	50.26	35.24	14	0	9	0	26	1	5	6	7	18	4	6	28	0	32	10	0	61	23.03	12	1	0	0	0	0	1	1	0	0
38		0	0	1	0	0	26	30	5	7	3	5	3	1	3	6	13.46	16.283	37.65	24.19	16	0	10	0	46	0	3	6	8	17	6	5	28	0	32	10	1	67	23.51	6	9	0	0	0	0	0	1	0	1
39	1	1	0	2	0	0	24	27	2	7	3	6	3	1	2	6	20.1	22.88	58.69	38.59	4	1	12	0	2	1	0	0	0	0	0	0	0	0	22	9	0	66	22.3081	2	20	1	1	1	1	1	1	1	1
40	0	1	0	12	0	0	24	27	4	5	3	6	1	1	3	6	10.59	14.25	43.19	32.6	6	1	9	0	29	1	5	7	7	19	6	5	30	0	24	7	1	72	19.0039	12	21	1	1	1	1	1	0	0	0
41		0	0	12	0	0	27	29	4	8	3	6	3	2	3	6	16.45	22.89	68.66	52.21	18	0	8	0	35	0	4	7	8	19	6	6	31	0	34	10	1	61	25.39	12	9	1	0	0	1	0	1	0	0
42	0	1	1	5	0	0	24	25	3	6	3	5	2	1	3	6	17.4	20.3	46.03	28.63	15	0	4	1	15	1	1	4	4	9	4	4	17	0	14	10	1	74	22.8928	5	16	1	0	0	1	1	0	0	0
43	0	1	0	5	0	0	23	28	3	7	3	6	3	1	0	6	13.71	20.12	21.71	8	25	0	10	0	25	1	3	6	8	17	6	6	29	1	29	10	0	51	23.4375	5	16	1	0	0	1	1	0	1	0
44	0	1	0	16	0	0	23	28	3	7	3	6	3	1	0	6	13.71	30.67	56.74	43.03	25	0	11	0	25	1	3	6	8	17	6	6	29	0	29	10	0	51	22.72	13	15	1	1	1	1	0	0	0	1
45	1	1	0	0	0	0	23	27	3	6	3	6	2	1	1	6	11.97	15.75	47.43	35.46	9	1	7	0	15	1	3	5	6	14	1	1	16	0	16	7	1	61	26.0584	0	15	1	1	0	1	1	1	0	0
46	0	1	1	9	0	0	23	26	2	5	3	5	1	1	5	6	22.88	74.48	135.16	112.28	13	0	7	1	23	1	3	5	9	17	6	6	29	0	32	7	1	56	22.0604	9	13	1	0	0	0	1	1	0	0
47		0	0	5	0	0	26	29	3	7	3	5	3	1	4	6	21.34	30.27	62.53	41.19	13	0	8	0	29	1	3	6	5	14	2	4	20	0	26	4	0	57	23.38	6	5	1	0	0	0	1	0	0	0
48	1	1	1	5	0	0	23	26	4	5	3	5	1	1	2	6	21.52	25.85	57.1	35.58	13	0	5	1	23	1	1	1	6	8	4	3	15	0	37	10	0	57	35.4922	5	12	1	1	0	0	1	1	1	1
49	1	1	1	8	0	0	23	26	2	6	3	6	2	1	3	6	12.59	16.2	48.92	36.33	16	0	10	0	30	1	2	5	6	13	5	3	21	0	24	7	1	66	23.6244	8	16	0	0	0	0	1	0	0	0
50	1	1	0	2	0	0	22	29	2	5	3	6	2	0	2	6	35.01	43.25	90.24	55.23	9	1	8	0	19	1	3	4	6	13	4	5	22	0	28	4	1	58	21.9388	2	15	1	1	1	1	1	1	0	0
51	0	1	0	16	0	0	23	28	3	7	3	6	3	1	0	6	13.71	30.67	56.74	43.03	25	0	11	0	25	1	3	6	8	17	6	6	29	0	29	10	0	51	22.72	13	15	1	1	1	1	0	0	0	1
52	1	1	0	9	0	0	22	29	2	6	3	6	2	1	2	6	24.87	30.23	88.46	63.59	4	1	5	1	15	1	3	3	5	11	3	3	17	1	20	7	1	70	29.0487	9	21	1	1	1	1	1	1	0	0
53	0	1	0	9	0	0	22	27	3	6	3	6	2	1	1	6	19.6	19.64	86.29	66.69	19	0	8	0	13	1	3	7	8	18	4	4	26	0	20	10	0	79	22.4766	9	13	1	1	1	1	1	1	1	1
54	0	1	0	2	0	0	22	27	4	5	3	5	1	1	2	5	21.95	33.89	56.11	34.16	9	1	7	0	20	1	3	8	9	20	7	6	33	0	28	7	1	75	27.7662	2	17	1	0	1	1	0	1	0	0
55	1	1	1	4	0	0	22	26	4	5	3	6	1	1	0	6	25.43	30.08	73.01	47.58	12	1	11	0	17	1	3	4	6	13	4	3	20	0	24	10	0	78	26.3656	4	14	1	1	0	0	1	0	0	0
56		1	1	5	1	1	17	23	3	4	3	5	0	1	0	4	10.63	29.51	72.32	61.69	8	1	7	0	17	1	2	5	5	12	3	3	18	0	20	9	0	71	20.98	1	12	0	0	0	1	1	0	0	1
57	0	1	1	12	0	0	22	25	5	5	3	6	1	1	0	6	28	35.56	38.66	10.66	9	1	12	0	18	1	2	4	5	11	5	5	21	1	5	10	0	71	21.0772	12	12	1	0	0	0	1	1	0	0
58	1	1	1	12	0	0	22	25	4	7	3	6	2	2	0	5	15.18	15.01	50.46	35.28	8	1	9	0	34	0	3	3	4	10	0	0	10	0	22	10	1	71	22.2222	12	5	1	0	1	0	1	1	0	0
59	0	1	0	14	0	0	21	29	5	4	3	5	1	0	1	6	16.24	22.73	90.08	73.84	9	1	7	1	25	1	1	5	6	12	3	4	19	0	26	5	1	80	25.3333	14	8	1	0	0	0	1	0	0	0
60	1	1	0	9	0	0	21	27	4	5	3	6	1	1	1	5	13.47	20.23	46.92	33.45	6	1	8	0	32	1	2	4	7	13	2	2	17	0	36	10	0	67	24.0055	9	10	1	0	1	1	1	1	0	0
61	1	1	0	10	0	0	21	27	4	5	3	6	1	1	1	5	26.34	49.23	70.84	44.5	6	1	8	0	32	1	2	4	7	13	2	2	17	1	36	10	1	67	24.16	9	12	0	0	0	1	0	1	0	0
62	1	1	0	9	0	0	20	29	3	5	3	6	2	0	0	6	20.51	24.26	57.6	37.09	11	1	5	1	21	1	1	3	3	7	0	0	7	0	20	7	0	69	26.9896	9	11	1	1	0	0	1	1	0	1
63	0	1	0	9	0	0	20	28	2	4	3	6	1	0	2	6	20.07	26.9	45.97	25.9	11	1	6	1	22	1	3	5	7	15	6	6	27	0	20	7	1	80	17.5668	9	20	1	0	0	0	0	1	0	0
64	1	1	1	6	0	0	20	26	3	4	3	5	1	0	0	5	15.33	14.97	54.55	39.22	11	1	6	1	20	1	3	5	6	14	4	3	21	0	32	9	0	61	24.4898	6	5	1	0	1	0	1	1	0	1
65	1	1	1	6	0	0	20	26	5	3	3	5	0	0	0	6	18.45	24.44	59.99	41.54	10	1	5	1	16	1	3	4	5	12	4	3	19	0	32	10	0	59	22.4082	6	13	1	0	1	1	0	0	1	0
66	1	1	1	6	0	0	20	25	4	4	3	6	1	0	0	6	18.36	24.92	66.23	47.87	12	1	5	1	17	1	2	5	5	12	2	1	15	0	26	7	0	65	25.9516	6	7	1	1	0	1	1	1	0	0
67	1	1	0	10	0	0	21	27	4	5	3	6	1	1	1	5	26.34	49.23	70.84	44.5	6	1	8	0	32	1	2	4	7	13	2	2	17	1	36	10	1	67	24.16	9	12	0	0	0	1	0	1	0	0
68	1	1	1	12	0	0	20	25	4	7	3	4	3	1	0	5	19.21	23.05	68.05	48.84	12	1	7	1	18	1	2	5	6	13	0	0	13	0	4	9	0	69	23.9334	12	1	1	0	0	1	1	1	0	0
69		1	1	7	1	0	20	24	3	7	3	6	3	1	0	3	17.22	22.76	60.46	43.24	11	1	5	1	18	1	2	5	6	13	1	1	15	1	14	6	1	70	22.8928	7	17	1	0	0	0	0	1	0	0
70	1	1	1	8	0	0	19	26	3	4	3	6	1	0	0	6	13.65	18.25	40	26.35	11	1	8	0	17	1	2	2	6	10	2	1	13	0	28	10	1	73	26.3702	8	5	1	0	0	0	1	0	0	0
71		1	1	16	1	0	19	24	3	5	3	5	1	1	0	6	12.89	15.85	29.28	16.39	12	1	9	0	27	1	5	6	8	19	5	4	28	0	24	10	0	68	24.7676	16	3	0	0	0	1	1	1	0	0
72		1	1	11	1	0	19	24	2	4	3	4	1	0	2	6	33.02	50.23	83.76	50.74	6	1	6	1	20	1	4	6	6	16	5	4	25	1	24	7	0	57	24.21	10	8	1	1	1	0	1	1	1	0
73	1	1	1	0	0	0	19	24	2	4	3	4	1	0	2	6	33.02	31.65	65.75	32.73	6	1	7	0	20	1	4	6	6	16	5	4	25	0	24	7	0	57	27.1605	0	11	1	1	0	0	1	1	0	0
74	1	1	1	0	0	0	19	23	2	5	3	6	2	0	1	4	33.21	40.06	99.88	66.67	12	1	4	1	9	1	4	4	5	13	3	2	18	0	14	5	1	68	21.9076	0	5	1	0	1	1	1	1	0	0
75		1	1	11	1	0	19	24	2	4	3	4	1	0	2	6	33.02	50.23	83.76	50.74	6	1	6	1	20	1	4	6	6	16	5	4	25	1	24	7	0	57	24.21	10	8	1	1	1	0	1	1	1	0
76		1	1	8	1	0	18	23	2	5	3	6	2	0	0	5	22.44	56.84	288.1	265.66	5	1	12	0	1	1	0	0	1	1	0	0	1	0	24	6	0	77	24.6181	8	10	1	0	1	0	1	1	1	0
77		1	1	2	0	1	17	23	2	3	3	5	0	0	0	6	15.25	14.59	64.93	49.68	8	1	6	1	26	1	2	6	10	18	6	4	28	0	22	9	1	64	21.7738	4	15	1	0	1	1	1	1	0	0
78		1	1	5	1	1	17	23	3	4	3	5	0	1	0	4	10.63	29.51	72.32	61.69	8	1	7	0	17	1	2	5	5	12	3	3	18	0	20	9	0	71	20.98	3	12	0	0	0	1	1	0	0	1
79		1	1	5	1	1	17	23	3	4	3	5	0	1	0	4	10.63	21.12	61.85	51.22	8	1	6	1	17	1	2	5	5	12	3	3	18	0	20	9	0	71	24.974	5	5	1	0	0	0	1	1	1	1
80		1	1	1	0	1	17	22	3	4	3	3	1	0	1	5	20.22	38.55	66.71	46.49	12	1	3	1	22	1	3	5	9	17	4	2	23	0	24	7	1	65	30.0801	3	3	1	1	0	0	1	1	0	0
81		1	1	9	1	1	15	23	1	4	3	5	0	1	0	5	32.33	25.9	120.28	87.95	9	1	5	1	6	1	1	4	5	10	0	0	10	0	4	4	0	72	18.7305	9	20	1	0	1	0	1	0	0	0
82		1	1	9	1	1	6	14	0	4	3	3	0	1	0	1	34.12	40.87	149.86	115.74	7	1	4	1	4	1	1	2	3	6	1	0	7	0	4	1	0	82	24.2215	9	15	1	0	1	1	1	1	0	0
83		1	1	2	1	1	5	8	0	1	1	1	0	0	0	2	42.43	70.19	289.4	246.97	5	1	2	1	1	1	1	1	1	3	0	0	3	0	0	1	0	65	19.8141	2	5	1	0	0	1	1	1	0	0
84	0	1	0	12	0	0	24	28	3	8	3	6	3	2	1	6	15.02	19.53	64.58	49.56	15	0	10	0	15	1	5	6	7	18	4	6	28	1	28	10	1	76	24.6548	12	25	1	0	1	1	1	1	0	0
																				3985.52
[truncated: 8 more columns]
